# Supplementary material for: N-terminal pro-brain natriuretic peptide and associated factors in the general working population: a baseline survey of the Uranosaki cohort study
Source: PubMed Central journal article supplement (PMC5517578; doi:10.1038/s41598-017-06090-6), 2017-07-19
Supplement: 41598_2017_6090_MOESM1_ESM.pdf [file 41598_2017_6090_MOESM1_ESM.pdf]

1 **N-terminal pro-brain natriuretic peptide and associated factors in the general working**  
2 **population: a baseline survey of the Uranosaki cohort study**

3

4 Atsushi Tanaka<sup>1</sup>, Hisako Yoshida<sup>2</sup>, Atsushi Kawaguchi<sup>2</sup>, Jun-ichi Oyama<sup>1</sup>, Norihiko Kotooka<sup>1</sup>,  
5 Shigeru Toyoda<sup>3</sup>, Teruo Inoue<sup>3</sup>, Masafumi Natsuaki<sup>4</sup> & Koichi Node<sup>1</sup>

6

7 <sup>1</sup>Department of Cardiovascular Medicine, Saga University, Saga, Japan

8 <sup>2</sup>Clinical Research Center, Saga University, Saga, Japan

9 <sup>3</sup>Department of Cardiovascular Medicine, Dokkyo Medical University, Mibu, Japan

10 <sup>4</sup>Department of Internal Medicine, Imari Matsuura Hospital, Imari, Japan

11

12 Correspondence and requests for materials should be addressed to A.T. (email:

13 tanakaa2@cc.saga-u.ac.jp) and K.N. (email: node@cc.saga-u.ac.jp)

14

**Supplementary Figure 1. Participants' flowchart for analyses**

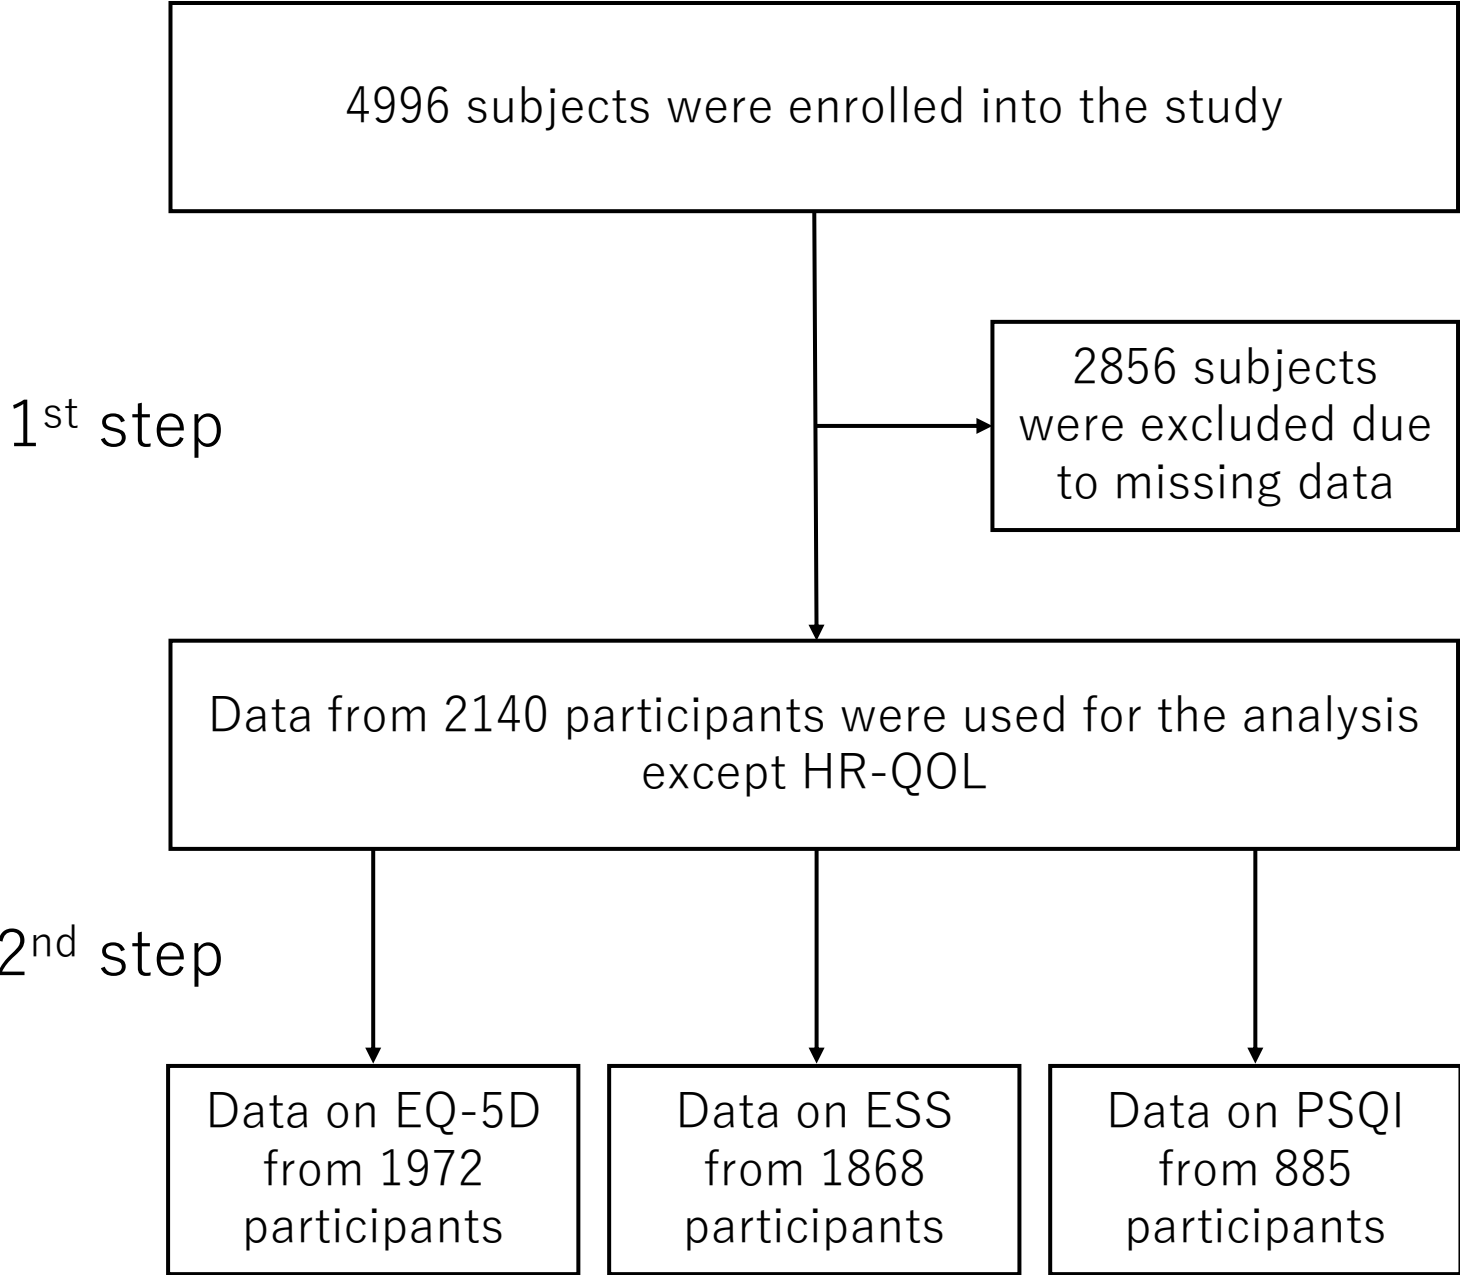

**Supplementary Table 1**

Factors correlated with NT-proBNP levels by sex

|                                          | Male                    |                              |                               |                        |         | Female                 |                              |                               |                        |         |
|------------------------------------------|-------------------------|------------------------------|-------------------------------|------------------------|---------|------------------------|------------------------------|-------------------------------|------------------------|---------|
|                                          | NT-proBNP               |                              |                               |                        | P-value | NT-proBNP              |                              |                               |                        | P-value |
|                                          | <40 pg/mL<br>(n = 1048) | 40 to <55 pg/mL<br>(n = 107) | 55 to <125 pg/mL<br>(n = 126) | ≥125 pg/mL<br>(n = 51) |         | <40 pg/mL<br>(n = 397) | 40 to <55 pg/mL<br>(n = 159) | 55 to <125 pg/mL<br>(n = 212) | ≥125 pg/mL<br>(n = 40) |         |
| NT-proBNP; pg/mL                         | 16.4 [10.0, 25.1]       | 46.1 [42.9, 50.5]            | 75.5 [63.2, 92.2]             | 213.8 [156.0, 516.3]   | <0.001  | 23.5 [16.0, 31.4]      | 47.7 [43.9, 50.8]            | 74.7 [64.0, 87.8]             | 156.3 [135.6, 183.0]   | <0.001  |
| Age; yrs                                 | 48.4 ± 8.1              | 53.2 ± 8.2                   | 53.7 ± 7.3                    | 55.2 ± 7.7             | <0.001  | 49.6 ± 7.7             | 50.7 ± 7.3                   | 51.4 ± 8.1                    | 54.8 ± 9.8             | <0.001  |
| Distribution; n (%)                      |                         |                              |                               |                        |         |                        |                              |                               |                        |         |
| <40                                      | 196 (18.7)              | 7 (6.5)                      | 1 (0.8)                       | 3 (5.9)                | <0.001  | 53 (13.4)              | 14 (8.8)                     | 22 (10.4)                     | 2 (5.0)                | <0.001  |
| 40 to 49                                 | 349 (33.3)              | 25 (23.4)                    | 30 (31.8)                     | 8 (13.7)               |         | 127 (32.0)             | 52 (32.7)                    | 55 (25.9)                     | 11 (27.5)              |         |
| 50 to 59                                 | 422 (40.3)              | 55 (51.4)                    | 56 (44.4)                     | 31 (60.8)              |         | 183 (46.1)             | 81 (50.9)                    | 112 (52.8)                    | 17 (42.5)              |         |
| 60 to 69                                 | 80 (7.6)                | 17 (15.9)                    | 28 (22.2)                     | 9 (17.7)               |         | 33 (8.3)               | 11 (6.9)                     | 21 (9.9)                      | 6 (15.0)               |         |
| ≥70                                      | 1 (0.1)                 | 3 (2.8)                      | 1 (0.8)                       | 1 (2.0)                |         | 1 (0.3)                | 1 (0.6)                      | 2 (0.9)                       | 4 (10.0)               |         |
| BMI; kg/m <sup>2</sup>                   | 23.3 ± 3.0              | 23.1 ± 3.7                   | 23.2 ± 3.6                    | 22.6 ± 3.6             | 0.475   | 22.7 ± 3.3             | 21.9 ± 3.0                   | 21.9 ± 3.1                    | 22.1 ± 3.8             | 0.013   |
| Waist circumference; cm                  | 82.7 ± 8.3              | 83.1 ± 9.7                   | 82.9 ± 9.9                    | 81.6 ± 9.3             | 0.801   | 79.3 ± 8.9             | 78.3 ± 8.1                   | 77.9 ± 9.0                    | 78 ± 8.2               | 0.258   |
| Obesity; n (%)                           | 275 (26.2)              | 26 (24.3)                    | 38 (30.2)                     | 12 (23.5)              | 0.708   | 90 (22.7)              | 23 (14.5)                    | 29 (13.7)                     | 8 (20.0)               | 0.022   |
| Systolic blood pressure; mm Hg           | 125.5 ± 13.7            | 129.7 ± 16.1                 | 132.8 ± 17.1                  | 141.4 ± 21.6           | <0.001  | 123.3 ± 15.1           | 122.4 ± 16.3                 | 125.2 ± 18.3                  | 128.6 ± 19.3           | 0.085   |
| Diastolic blood pressure; mm Hg          | 80.3 ± 9.6              | 81.5 ± 11.3                  | 82.7 ± 12                     | 85.9 ± 13.3            | <0.001  | 76.5 ± 9.7             | 75.2 ± 10.3                  | 75.7 ± 11.2                   | 78.3 ± 12.8            | 0.266   |
| Pulse pressure; mm Hg                    | 45.2 ± 9.3              | 48.2 ± 9.6                   | 50.1 ± 10.8                   | 55.5 ± 13.9            | <0.001  | 46.8 ± 10.2            | 47.1 ± 11.4                  | 49.6 ± 12.3                   | 50.3 ± 14.2            | 0.011   |
| Hypertension; n (%)                      | 292 (27.9)              | 40 (37.4)                    | 60 (47.6)                     | 35 (38.6)              | <0.001  | 89 (22.4)              | 40 (25.2)                    | 59 (27.8)                     | 19 (47.5)              | 0.005   |
| Metabolic syndrome; n (%)                | 178 (17.0)              | 22 (20.6)                    | 29 (23.0)                     | 15 (29.4)              | 0.054   | 17 (4.3)               | 5 (3.1)                      | 11 (5.2)                      | 1 (2.5)                | 0.742   |
| Current smoking; n (%)                   | 514 (49.1)              | 50 (46.7)                    | 67 (53.2)                     | 26 (51.0)              | 0.771   | 39 (9.8)               | 31 (19.5)                    | 32 (15.1)                     | 2 (5.0)                | 0.005   |
| Total cholesterol; mg/dL                 | 204 ± 33.2              | 201.6 ± 35.9                 | 198.3 ± 34.2                  | 191.8 ± 36.5           | 0.027   | 211.8 ± 32.9           | 211.6 ± 33.6                 | 204.7 ± 37.1                  | 197.4 ± 30.7           | 0.009   |
| Triglyceride; mg/dL                      | 98 [68, 148]            | 93 [66, 147]                 | 84 [66, 126]                  | 94 [72, 137]           | 0.193   | 69 [52, 93]            | 68 [50, 96]                  | 69 [50, 95]                   | 74 [55, 102]           | 0.703   |
| HDL-cholesterol; mg/dL                   | 60.6 ± 16.1             | 62.8 ± 17.2                  | 65.9 ± 16.5                   | 65.4 ± 21.3            | 0.002   | 72.3 ± 15.6            | 72.9 ± 16.8                  | 71.7 ± 14.9                   | 67.1 ± 15.7            | 0.200   |
| LDL-cholesterol; mg/dL                   | 127.3 ± 32.2            | 122.9 ± 32.6                 | 118.6 ± 34.3                  | 110.8 ± 31.4           | <0.001  | 128.1 ± 31.7           | 128.5 ± 31.9                 | 122.2 ± 34                    | 118 ± 23.5             | 0.042   |
| Uric acid; mg/dL                         | 6.0 ± 1.3               | 6.1 ± 1.5                    | 6.0 ± 1.4                     | 6.1 ± 1.5              | 0.992   | 4.5 ± 1.0              | 4.4 ± 0.9                    | 4.4 ± 1.1                     | 4.5 ± 1.3              | 0.727   |
| Fasting blood sugar; mg/dL               | 102.2 ± 16.6            | 102.7 ± 19.8                 | 104 ± 19.3                    | 109.8 ± 30.7           | 0.024   | 96.2 ± 14.9            | 96 ± 15.7                    | 96.5 ± 19.1                   | 97.2 ± 13.1            | 0.974   |
| eGFR; mL/min/1.73m <sup>2</sup>          | 78.7 ± 14               | 76.3 ± 14.7                  | 74.6 ± 12.8                   | 71.8 ± 18.3            | <0.001  | 80.6 ± 14.1            | 78 ± 14.1                    | 79.7 ± 13.7                   | 80.5 ± 16.8            | 0.271   |
| Proteinuria; n (%)                       | 37 (3.5)                | 2 (1.9)                      | 10 (7.9)                      | 10 (19.6)              | <0.001  | 7 (1.8)                | 4 (2.5)                      | 3 (1.4)                       | 0 (0.0)                | 0.704   |
| Hemoglobin; g/dL                         | 15.2 ± 1                | 14.9 ± 1.1                   | 14.8 ± 1.2                    | 14.8 ± 1.4             | <0.001  | 13.1 ± 1.3             | 12.9 ± 1.1                   | 12.7 ± 1.5                    | 12.4 ± 1.2             | <0.001  |
| High molecular weight adiponectin; µg/mL | 4.2 [2.5, 6.7]          | 5 [3.0, 7.5]                 | 5.3 [3.3, 9.4]                | 5.5 [3.1, 8.4]         | <0.001  | 8.6 [5.4, 12.1]        | 9.2 [5.8, 13.1]              | 8.8 [5.7, 14.6]               | 9.4 [6.3, 16.1]        | 0.257   |
| High sensitivity troponin T; pg/mL       | 3 [3, 4]                | 3 [3, 5]                     | 4 [3, 5]                      | 7 [3, 15]              | <0.001  | 3 [3, 3]               | 3 [3, 3]                     | 3 [3, 3]                      | 3 [3, 7]               | <0.001  |

Data are shown as Mean ± SD, Median [IQR], or n (%). Abbreviations, see Table 1.

**Supplementary Table 2**

Factors correlated with logarithmic NT-proBNP by adjusted regression analysis by sex

|                                       | Male<br>(n = 1332) |         |              |         | Female<br>(n = 808) |         |              |         |
|---------------------------------------|--------------------|---------|--------------|---------|---------------------|---------|--------------|---------|
|                                       | Univariate         |         | Multivariate |         | Univariate          |         | Multivariate |         |
|                                       | $\beta$            | P-value | $\beta$      | P-value | $\beta$             | P-value | $\beta$      | P-value |
| Age                                   | 0.038              | <0.001  | 0.028        | <0.001  | 0.013               | <0.001  | 0.016        | <0.001  |
| Body mass index                       | -0.018             | 0.026   |              |         | -0.038              | <0.001  | -0.039       | <0.001  |
| Waist circumference                   | -0.004             | 0.157   |              |         | -0.010              | 0.001   |              |         |
| Obesity                               | -0.042             | 0.467   |              |         | -0.236              | <0.001  |              |         |
| Systolic blood pressure               | 0.015              | <0.001  |              |         | 0.003               | 0.071   |              |         |
| Diastolic blood pressure              | 0.011              | <0.001  | 0.010        | <0.001  | -0.001              | 0.699   |              |         |
| Pulse pressure                        | 0.023              | <0.001  | 0.015        | <0.001  | 0.007               | 0.003   |              |         |
| Hypertension                          | 0.400              | <0.001  |              |         | 0.143               | 0.016   | 0.081        | 0.008   |
| Metabolic syndrome                    | 0.200              | 0.002   |              |         | -0.013              | 0.921   |              |         |
| Smoking habit                         | 0.029              | 0.564   | 0.073        | 0.001   | 0.135               | 0.083   | 0.108        | 0.004   |
| Total cholesterol                     | -0.003             | <0.001  | -0.003       | <0.001  | -0.003              | <0.001  | -0.003       | <0.001  |
| Log Triglyceride                      | -0.129             | 0.004   |              |         | -0.097              | 0.090   |              |         |
| HDL-cholesterol                       | 0.006              | <0.001  |              |         | -0.002              | 0.332   |              |         |
| LDL-cholesterol                       | -0.004             | <0.001  |              |         | -0.002              | 0.004   |              |         |
| Uric acid                             | -0.028             | 0.139   |              |         | -0.073              | 0.003   |              |         |
| Fasting blood sugar                   | 0.003              | 0.048   |              |         | -0.003              | 0.106   |              |         |
| eGFR                                  | -0.008             | <0.001  |              |         | 0.001               | 0.859   |              |         |
| Proteinuria                           | 0.499              | <0.001  |              |         | -0.176              | 0.379   |              |         |
| Hemoglobin                            | -0.160             | <0.001  | -0.118       | <0.001  | -0.099              | <0.001  | -0.111       | <0.001  |
| Log High molecular weight adiponectin | 0.201              | <0.001  | 0.154        | <0.001  | 0.086               | 0.026   |              |         |
| Log High sensitivity troponin T       | 0.731              | <0.001  | 0.465        | <0.001  | 0.450               | <0.001  | 0.378        | <0.001  |

A list of variables, see Table 3. Abbreviations, see Table 1.

**Supplementary Table 3**

Multivariate analysis of the association between NT-proBNP and EQ-5D

|                                       | Overall<br>(n = 1972) |         |         |         |         |         | Male<br>(n = 1237) |         |         |         |         |         | Female<br>(n = 735) |         |         |         |         |         |
|---------------------------------------|-----------------------|---------|---------|---------|---------|---------|--------------------|---------|---------|---------|---------|---------|---------------------|---------|---------|---------|---------|---------|
|                                       | Model 1               |         | Model 2 |         | Model 3 |         | Model 1            |         | Model 2 |         | Model 3 |         | Model 1             |         | Model 2 |         | Model 3 |         |
|                                       | $\beta$               | P-value | $\beta$ | P-value | $\beta$ | P-value | $\beta$            | P-value | $\beta$ | P-value | $\beta$ | P-value | $\beta$             | P-value | $\beta$ | P-value | $\beta$ | P-value |
| EQ-5D                                 | 0.114                 | 0.015   | 0.022   | 0.613   | 0.012   | 0.765   | -0.001             | 0.985   | -0.014  | 0.811   | -0.035  | 0.531   | 0.117               | 0.048   | 0.094   | 0.109   | 0.095   | 0.085   |
| Age                                   |                       |         | 0.029   | <0.001  | 0.022   | <0.001  |                    |         | 0.037   | <0.001  | 0.026   | <0.001  |                     |         | 0.013   | <0.001  | 0.017   | <0.001  |
| Male sex                              |                       |         | -0.533  | <0.001  | -0.362  | <0.001  |                    |         |         |         |         |         |                     |         |         |         |         |         |
| Body mass index                       |                       |         |         |         | -0.027  | <0.001  |                    |         |         |         |         |         |                     |         |         |         | -0.045  | <0.001  |
| Waist circumference                   |                       |         |         |         |         |         |                    |         |         |         |         |         |                     |         |         |         |         |         |
| Obesity                               |                       |         |         |         |         |         |                    |         |         |         |         |         |                     |         |         |         |         |         |
| Systolic blood pressure               |                       |         |         |         | 0.010   | <0.001  |                    |         |         |         |         |         |                     |         |         |         | 0.005   | 0.009   |
| Diastolic blood pressure              |                       |         |         |         | -0.005  | 0.081   |                    |         |         |         | 0.008   | 0.003   |                     |         |         |         |         |         |
| Pulse pressure                        |                       |         |         |         |         |         |                    |         |         | 0.015   | <0.001  |         |                     |         |         |         |         |         |
| Hypertension                          |                       |         |         |         |         |         |                    |         |         |         |         |         |                     |         |         |         |         |         |
| Metabolic syndrome                    |                       |         |         |         | 0.219   | 0.001   |                    |         |         |         | 0.099   | 0.160   |                     |         |         |         | 0.244   | 0.104   |
| Smoking habit                         |                       |         |         |         | 0.164   | <0.001  |                    |         |         |         | 0.170   | <0.001  |                     |         |         |         | 0.217   | 0.007   |
| Total cholesterol                     |                       |         |         |         | -0.007  | <0.001  |                    |         |         |         | -0.004  | <0.001  |                     |         |         |         | -0.011  | 0.009   |
| Log Triglyceride                      |                       |         |         |         |         |         |                    |         |         |         |         |         |                     |         |         |         |         |         |
| HDL-cholesterol                       |                       |         |         |         | 0.004   | 0.035   |                    |         |         |         | 0.003   | 0.067   |                     |         |         |         | 0.006   | 0.152   |
| LDL-cholesterol                       |                       |         |         |         | 0.003   | 0.099   |                    |         |         |         |         |         |                     |         |         |         | 0.008   | 0.063   |
| Uric acid                             |                       |         |         |         |         |         |                    |         |         |         |         |         |                     |         |         |         |         |         |
| Fasting blood sugar                   |                       |         |         |         | -0.003  | 0.019   |                    |         |         |         | -0.003  | 0.030   |                     |         |         |         | -0.003  | 0.102   |
| eGFR                                  |                       |         |         |         | -0.002  | 0.160   |                    |         |         |         | -0.003  | 0.104   |                     |         |         |         |         |         |
| Proteinuria                           |                       |         |         |         | 0.220   | 0.026   |                    |         |         |         | 0.273   | 0.020   |                     |         |         |         |         |         |
| Hemoglobin                            |                       |         |         |         | -0.122  | <0.001  |                    |         |         |         | -0.127  | <0.001  |                     |         |         |         | -0.108  | <0.001  |
| Log High molecular weight adiponectin |                       |         |         |         | 0.063   | 0.016   |                    |         |         |         | 0.129   | <0.001  |                     |         |         |         |         |         |
| Log High sensitivity troponin T       |                       |         |         |         | 0.480   | <0.001  |                    |         |         |         | 0.468   | <0.001  |                     |         |         |         | 0.404   | <0.001  |

A list of variables, see Table 4. Abbreviations, see Table 1.

**Supplementary Table 4**

Multivariate analysis of the association between NT-proBNP and ESS

|                                       | Overall<br>(n = 1768) |         |         |         |         |         | Male<br>(n = 1102) |         |         |         |         |         | Female<br>(n = 666) |         |         |         |         |         |
|---------------------------------------|-----------------------|---------|---------|---------|---------|---------|--------------------|---------|---------|---------|---------|---------|---------------------|---------|---------|---------|---------|---------|
|                                       | Model 1               |         | Model 2 |         | Model 3 |         | Model 1            |         | Model 2 |         | Model 3 |         | Model 1             |         | Model 2 |         | Model 3 |         |
|                                       | $\beta$               | P-value | $\beta$ | P-value | $\beta$ | P-value | $\beta$            | P-value | $\beta$ | P-value | $\beta$ | P-value | $\beta$             | P-value | $\beta$ | P-value | $\beta$ | P-value |
| ESS                                   | 0.006                 | 0.947   | -0.022  | 0.803   | 0.003   | 0.966   | -0.099             | 0.444   | -0.103  | 0.401   | -0.060  | 0.598   | 0.027               | 0.815   | 0.050   | 0.671   | 0.027   | 0.805   |
| Age                                   |                       |         | 0.028   | <0.001  | 0.023   | <0.001  |                    |         | 0.036   | <0.001  | 0.026   | <0.001  |                     |         | 0.013   | 0.001   | 0.018   | <0.001  |
| Male sex                              |                       |         | -0.534  | <0.001  | -0.351  | <0.001  |                    |         |         |         |         |         |                     |         |         |         |         |         |
| Body mass index                       |                       |         |         |         | -0.023  | 0.001   |                    |         |         |         |         |         |                     |         |         |         | -0.041  | <0.001  |
| Waist circumference                   |                       |         |         |         |         |         |                    |         |         |         |         |         |                     |         |         |         |         |         |
| Obesity                               |                       |         |         |         |         |         |                    |         |         |         |         |         |                     |         |         |         |         |         |
| Systolic blood pressure               |                       |         |         |         | 0.009   | <0.001  |                    |         |         |         |         |         |                     |         |         |         | 0.005   | 0.009   |
| Diastolic blood pressure              |                       |         |         |         | -0.003  | 0.223   |                    |         |         |         | 0.008   | 0.005   |                     |         |         |         |         |         |
| Pulse pressure                        |                       |         |         |         |         |         |                    |         |         | 0.014   | <0.001  |         |                     |         |         |         |         |         |
| Hypertension                          |                       |         |         |         |         |         |                    |         |         |         |         |         |                     |         |         |         |         |         |
| Metabolic syndrome                    |                       |         |         |         | 0.222   | 0.001   |                    |         |         |         | 0.106   | 0.148   |                     |         |         |         | 0.261   | 0.088   |
| Smoking habit                         |                       |         |         |         | 0.158   | <0.001  |                    |         |         |         | 0.150   | 0.003   |                     |         |         |         | 0.229   | 0.006   |
| Total cholesterol                     |                       |         |         |         | -0.003  | <0.001  |                    |         |         |         | -0.003  | <0.001  |                     |         |         |         | -0.003  | 0.003   |
| Log Triglyceride                      |                       |         |         |         | -0.077  | 0.054   |                    |         |         |         |         |         |                     |         |         |         | -0.131  | 0.063   |
| HDL-cholesterol                       |                       |         |         |         |         |         |                    |         |         |         | 0.002   | 0.220   |                     |         |         |         |         |         |
| LDL-cholesterol                       |                       |         |         |         |         |         |                    |         |         |         |         |         |                     |         |         |         |         |         |
| Uric acid                             |                       |         |         |         |         |         |                    |         |         |         |         |         |                     |         |         |         |         |         |
| Fasting blood sugar                   |                       |         |         |         | -0.003  | 0.009   |                    |         |         |         | -0.003  | 0.034   |                     |         |         |         | -0.003  | 0.103   |
| eGFR                                  |                       |         |         |         |         |         |                    |         |         |         | -0.003  | 0.188   |                     |         |         |         |         |         |
| Proteinuria                           |                       |         |         |         | 0.361   | 0.001   |                    |         |         |         | 0.450   | <0.001  |                     |         |         |         |         |         |
| Hemoglobin                            |                       |         |         |         | -0.114  | <0.001  |                    |         |         |         | -0.122  | <0.001  |                     |         |         |         | -0.101  | <0.001  |
| Log High molecular weight adiponectin |                       |         |         |         | 0.083   | 0.003   |                    |         |         |         | 0.145   | <0.001  |                     |         |         |         |         |         |
| Log High sensitivity troponin T       |                       |         |         |         | 0.440   | <0.001  |                    |         |         |         | 0.405   | <0.001  |                     |         |         |         | 0.432   | <0.001  |

A list of variables, see Table 4. Abbreviations, see Table 1.
